# Supplementary material
Source: publisher figshare collection journal article supplement (https://tandf.figshare.com/articles/dataset/_/7447541)
Supplement: Supplementary file 1 [file 1]

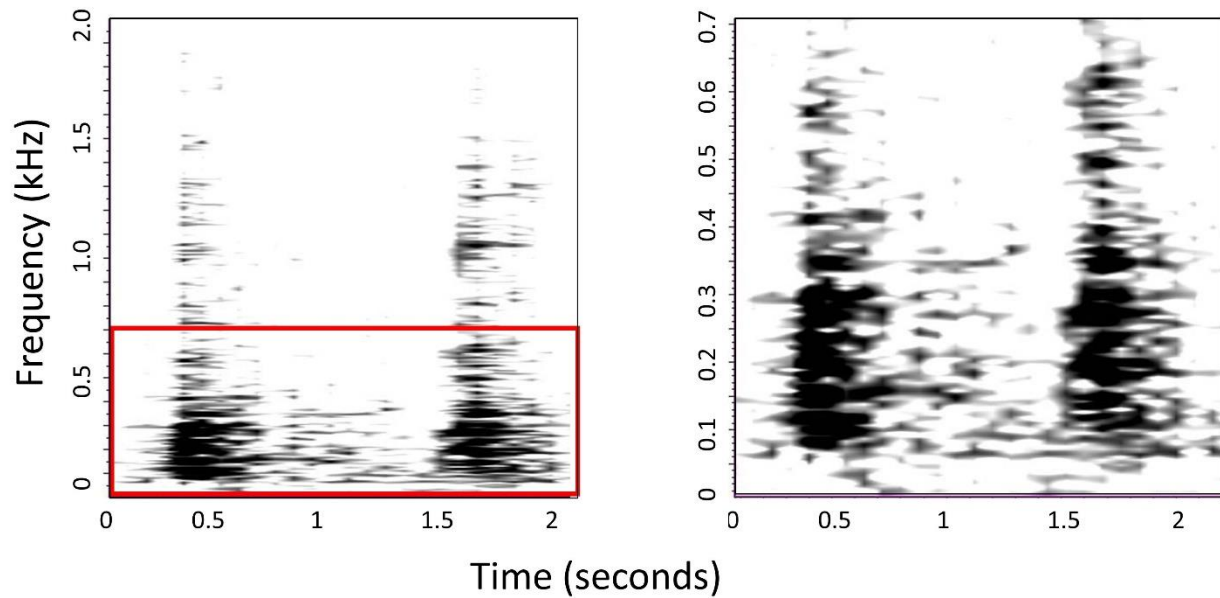

**Supplemental Figure 1.** Spectrogram showing the broadband pulse candidate call type (2,500-point fast Fourier transform, Hann window with 50% overlap). Calls were recorded in Cormorant Channel, British Columbia, Canada, during a single occasion when minke whales were the only baleen whale visually observed. Spectrogram on the right shows a higher resolution view of the frequency range contained in the red box in the spectrogram on the left.

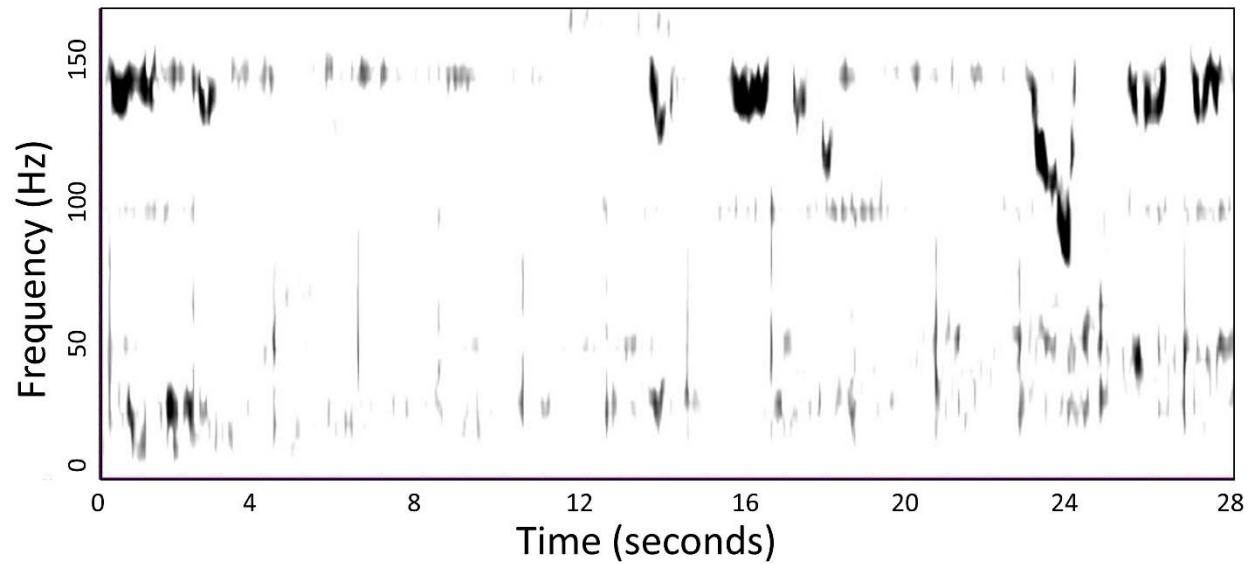

**Supplemental Figure 2.** Spectrogram showing the tonal waver candidate call type (2,500-point fast Fourier transform, Hann window with 50% overlap). Calls were recorded in Cormorant Channel, British Columbia, Canada, during a single occasion when minke whales were the only baleen whale visually observed.

**Supplemental Table 1.** Summary of acoustic parameters describing two call types recorded in the presence of minke whales in Cormorant Channel, British Columbia. All calls of each type were heard on a single occasion, and no other baleen whales were observed in the study area at these times. All statistics are reported as mean  $\pm$  standard deviation.

| <b>Call Type</b> | <b>Sample Size</b> | <b>Low Frequency (Hz)</b> | <b>High Frequency (Hz)</b> | <b>Duration (ms)</b> | <b>Peak Frequency (Hz)</b> |
|------------------|--------------------|---------------------------|----------------------------|----------------------|----------------------------|
| Broadband Pulse  | 2                  | 40 $\pm$ 8                | 2007 $\pm$ 62              | 190 $\pm$ 71         | 234 $\pm$ 44               |
| Tonal Waver      | 22                 | 106 $\pm$ 21              | 156 $\pm$ 7                | 940 $\pm$ 309        | 131 $\pm$ 14               |
